# Supplementary material
Source: PubMed Central journal article supplement (PMC7502756)
Supplement: pnas.2005217117.sapp.pdf [file pnas.2005217117.sapp.pdf]

Supplementary Information for

## **Site-specific covalent labeling of large RNAs with nanoparticles empowered by expanded genetic alphabet transcription**

Yan Wang<sup>a</sup>, Yaoyi Chen<sup>a, b</sup>, Yanping Hu<sup>a</sup>, and Xianyang Fang<sup>a, \*</sup>

<sup>a</sup>Beijing Advanced Innovation Center for Structural Biology, School of Life Sciences, Tsinghua University, Beijing 100084, China; <sup>b</sup>Present address: Department of Mathematics and Computer Science, Freie Universität Berlin, Berlin 14195, Germany

\*Xianyang Fang

**Email:** fangxy@tsinghua.edu.cn

### **This PDF file includes:**

Supplementary Information Text

Figures S1 to S3

Tables S1 to S7

SI References

## Supplementary Information Text

### Synthetic procedures and characterizations of rTPT3<sup>A</sup>

#### General

All solvents and reagents were purchased commercially and used without further purification. For synthetic procedures, all reactions were carried out in oven-dried glassware under an inert atmosphere. Solvents were distilled and/or dried over 4 Å molecular sieves. NMR spectra were recorded on an AVANCE III 1 BAY 400 MHz Bruker NMR spectrometer and the chemical shifts were reported relative to the deuterated NMR solvent used [<sup>1</sup>H-NMR: CDCl<sub>3</sub> (7.26 ppm), DMSO-d<sub>6</sub> (2.50 ppm); <sup>13</sup>C-NMR: CDCl<sub>3</sub> (77.16 ppm), DMSO-d<sub>6</sub> (39.52 ppm)]. Mass spectra were recorded on an Agilent 1200 + G6110A.

#### Synthetic schemes and procedures

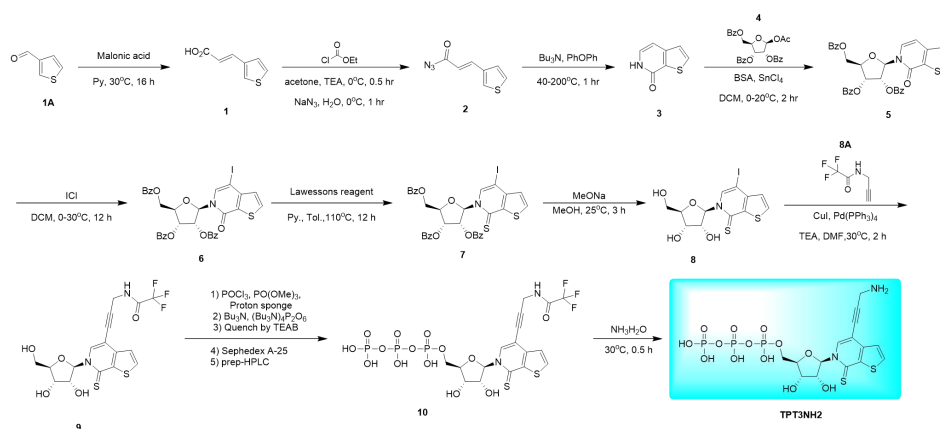

#### General procedure for preparation of compound 1

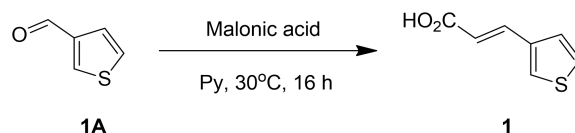

To a solution of **1A** (300.0 g, 2.6 mol, 243.9 mL, 1.00 eq) in Py (2000 mL) was added Malonic acid (389.7 g, 3.7 mol, 389.7 mL, 1.40 eq). The mixture was stirred at 30 °C for 16 hrs. TLC (petroleum ether/ethyl acetate = 1/1, R<sub>f</sub> = 0.21) indicated that **1A** was consumed completely and one new spot formed. The reaction was clean according to TLC.

Added 12 M HCl adjust pH 2-3, then the solid precipitation, filtered and washed with water, collect filter cake. The filter cake was soluble in EtOAc (5000 mL), added dry Na<sub>2</sub>SO<sub>4</sub>. The organic phase was concentrated under reduced pressure to give a residue. Compound **1** (300 g, crude) was obtained as a light white solid.

**TLC:** petroleum ether/ethyl acetate = 1/1, R<sub>f</sub> = 0.21

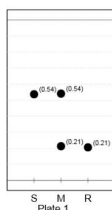

### General procedure for preparation of compound **2**

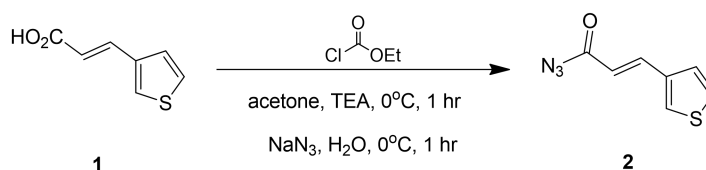

Add acetone (2000 mL) and TEA (236.3 g, 2.3 mol, 324.9 mL, 1.20 eq) and compound **1** (300.0 g, 1.9 mol, 1.0 eq) to a flask. Add ethyl carbonochloridate (232.3 g, 2.1 mol, 203.7 mL, 1.10 eq) dropwise at 0 °C to the mixture. Stir the mixture at 0 °C for 1 hr. TLC (plate 1: petroleum ether/ethyl acetate = 5/1, R<sub>f</sub> (material) = 0.05, R<sub>f</sub> (product) = 0.40) indicated material was consumed completely. Add NaN<sub>3</sub> (151.8 g, 2.3 mol, 1.20 eq) in H<sub>2</sub>O (750 mL) dropwise at 0 °C to the mixture. Stir the mixture at 0 °C for 1 hr. TLC (plate 2: petroleum ether/ethyl acetate = 5/1, R<sub>f</sub> = 0.54) indicated material was consumed completely and one new spot formed. Add H<sub>2</sub>O (1.5 L) to the mixture and filtered and check water phase to pH > 9. The filtered cake wash with H<sub>2</sub>O (500 mL) and filtered. The filtered cake was dissolved by EtOAc (1.0 L). Wash by brine (1.0 L x 2) and dry with Na<sub>2</sub>SO<sub>4</sub>. Concentrate until remained 1.0 L EtOAc. Add Ph<sub>2</sub>O (600 mL) and concentrated to get a solution of product

in Ph<sub>2</sub>O. The crude compound **2** (348.0 g, crude) with white solid in Ph<sub>2</sub>O was used into the next step without further purification.

**TLC** (plate 1: petroleum ether/ethyl acetate = 5/1, R<sub>f</sub> (material) = 0.05, R<sub>f</sub> (product) = 0.40)

**TLC** (plate 2: petroleum ether/ethyl acetate = 5/1, R<sub>f</sub> (material) = 0.4, R<sub>f</sub> (product) = 0.54)

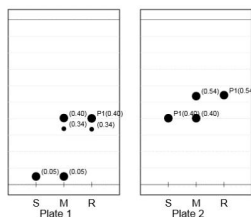

### **General procedure for preparation of compound 3**

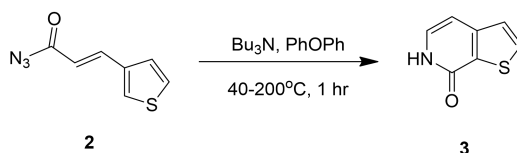

Add Ph<sub>2</sub>O (0.9 L) and Bu<sub>3</sub>N (239.8 g, 1.7 mol, 317.2 mL, 3.00 eq) to a flask at 150 °C. A heat solution (40-50 °C) of compound **2** (100.0 g, 558.0 mmol, 1.00 eq) in Ph<sub>2</sub>O (300 mL) was added to the flask at 200 °C. Stir the mixture at 200 °C for 1 hr. TLC (petroleum ether/ethyl acetate = 5/1, R<sub>f</sub> = 0.05) indicated compound **2** was consumed completely and one new spot formed. The reaction was clean according to TLC. The mixture was cooled to 20 °C and diluted with petroleum ether (10 L). All batches were combined together, the resulting solid was collected by filtration. Combine the two reactions to give a crude product. The filter cake was washed with hexane (5000 mL). The solid obtained was dried under vacuum to give the product. Compound **3** (200.0 g, 1.3 mol, 79.0% yield) was obtained as a yellow solid.

**TLC:** petroleum ether/ethyl acetate = 5/1, R<sub>f</sub> = 0.05

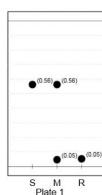

### General procedure for preparation of compound 5

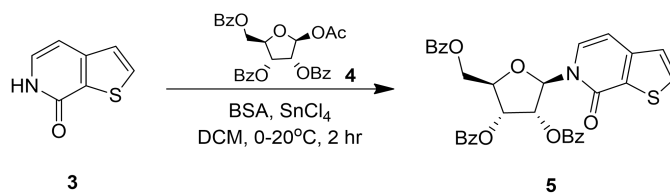

Added compound **3** (150 g, 992.16 mmol, 1.00 eq) and DCM (2500 mL) to a 5 L flask. Then add BSA (242 g, 1.2 mol, 294.3 mL, 1.20 eq) to the flask under  $N_2$ . Stir the mixture for 0.5 hr. Add **4** (550.6 g, 1.10 mol, 1.10 eq), then added  $SnCl_4$  (310.2 g, 1.2 mol, 139.1 mL, 1.20 eq) drop wise to the mixture at 0 °C. Stir the mixture at 20 °C for 1.5 hrs. TLC (petroleum ether/ethyl acetate = 2/1,  $R_f$  = 0.64) indicated compound **3** was consumed completely and one new spot formed. The reaction was clean according to TLC. Added sat.aq.  $NaHCO_3$  (3000 mL) to the mixture and adjust pH 7, then filtered. The filtrate was extracted by DCM (2000 mL x 2). Wash the organic phase with brine (1.5 L) and dry with  $Na_2SO_4$ , concentrate the organic phase to give crude product. The residue was purified by column chromatography ( $SiO_2$ , petroleum ether/ethyl acetate = 5/1 to 2/1). Compound **5** (950.0 g, 1.52 mol, 76.4% yield, 95.0% purity) was obtained as a white solid.

**TLC:** petroleum ether/ethyl acetate = 2/1,  $R_f$  = 0.64

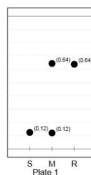

**<sup>1</sup>H NMR:** 400 MHz, CDCl<sub>3</sub>, δ ppm 8.17 (d, *J* = 7.2 Hz, 2H), 7.98 (t, *J* = 7.0 Hz, 4H), 7.72 (d, *J* = 5.2 Hz, 1H), 7.45-7.66 (m, 5H), 7.39 (q, *J* = 7.6 Hz, 5H), 7.18 (d, *J* = 5.2 Hz, 1H), 6.79 (d, *J* = 4.8 Hz, 1H), 6.57 (d, *J* = 7.4 Hz, 1H), 6.04 (t, *J* = 5.8 Hz, 1H), 5.88-5.97 (m, 1H), 4.91 (dd, *J* = 12.0, 2.8 Hz, 1H), 4.77-4.84 (m, 1H), 4.69-4.76 (m, 1H).

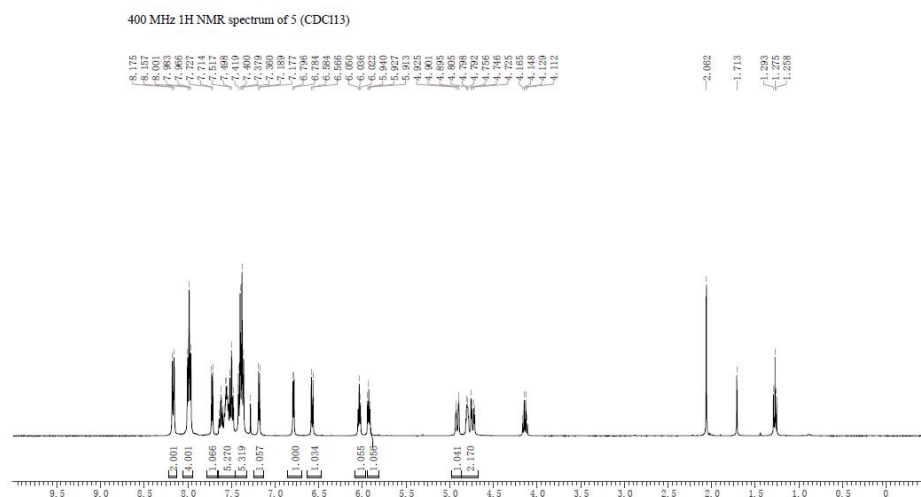

### General procedure for preparation of compound 6

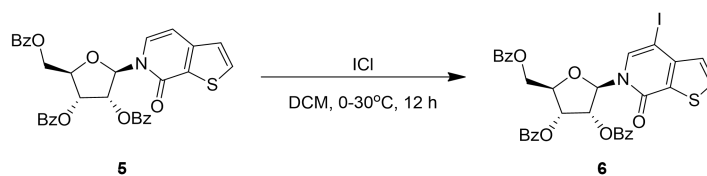

To a solution of compound **5** (340.0 g, 570.8 mmol, 1.00 eq) in DCM (2000 mL) was added ICl (185.4 g, 1.10 mol, 58.3 mL, 2.00 eq) at 0 °C. The mixture was stirred at 30 °C for 12 h under exclusion of light. TLC (petroleum ether/ethyl acetate = 3/1, *R<sub>f</sub>* = 0.36) indicated compound **5** was consumed completely and one new spot formed. The reaction was clean according to TLC. The reaction mixture was quenched by addition Na<sub>2</sub>S<sub>2</sub>O<sub>3</sub> (1500 mL) at 20 °C, and then diluted with DCM (2000 mL x 2). The organic layers were concentrated under reduced pressure to give a residue. The residue was purified by column chromatography (SiO<sub>2</sub>, petroleum ether/ethyl acetate = 5/1 to 3/1). Compound **6** (200 g, 249.5 mmol, 43.7% yield, 90.0% purity) was obtained as a white solid.

**TLC:** petroleum ether/ethyl acetate = 3/1,  $R_f = 0.36$

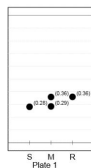

**General procedure for preparation of compound 7**

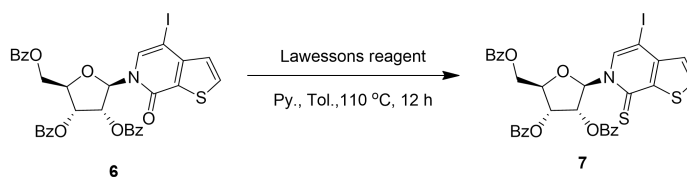

To a solution of compound **6** (140.0 g, 194.04 mmol, 1.00 eq) in toluene (1200 mL) was added 2, 4-bis (4-methoxyphenyl)-2, 4-dithioxo-1, 3, 2, 4-dithiadiphosphetane (117.7 g, 291.1 mmol, 1.50 eq) and Py (15.4 g, 194.0 mmol, 15.7 mL, 1.00 eq). The mixture was stirred at 110 °C for 12 h. TLC (petroleum ether/ethyl acetate = 3/1,  $R_f = 0.39$ ) indicated compound **6** was consumed completely and one new spot formed. The reaction was clean according to TLC. The reaction mixture was concentrated under reduced pressure to give a residue, the residue was diluted with DCM (1500 mL) and extracted with H<sub>2</sub>O (1000 mL x 2). The organic layers were concentrated under reduced pressure to give a residue, added 500 mL MeOH stirred for 2 h, filtered and get the cake. The residue was purified by column chromatography (SiO<sub>2</sub>, petroleum ether/ethyl acetate = 10/1 to 5/1). Compound **7** (100.0 g, crude) was obtained as a yellow solid.

**TLC:** petroleum ether/ethyl acetate = 3/1,  $R_f = 0.39$

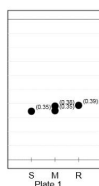

**<sup>1</sup>H NMR:** 400 MHz, CDCl<sub>3</sub>. δ ppm 8.07 - 8.13 (m, 3H), 7.97 (dd, *J* = 8.4, 1.2 Hz, 2H), 7.71-7.91 (m, 4H), 7.39-7.59 (m, 5H), 7.23-7.38 (m, 5H), 7.16 (d, *J* = 5.4 Hz, 1H), 5.78-5.87 (m, 2H), 4.88 (dd, *J* = 12.6, 2.4 Hz, 1H), 4.80 (td, *J* = 5.2, 2.6 Hz, 1H), 4.64-4.74 (m, 1H).

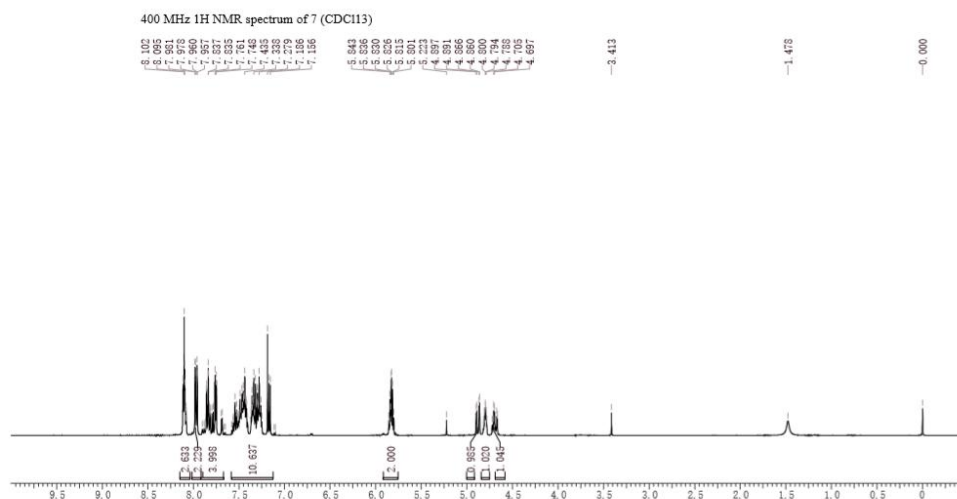

### General procedure for preparation of compound 8

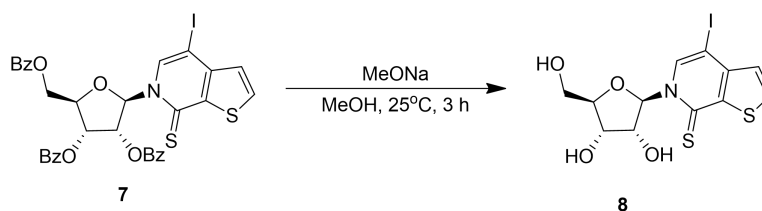

To a solution of compound **7** (100.0 g, 135.6 mmol, 1.00 eq) in MeOH (500 mL) and DCM (500 mL) was added NaOMe (3.66 g, 67.79 mmol, 0.500 eq). The mixture was stirred at 25 °C for 3 hrs. TLC indicated compound **7** was consumed completely and one new spot formed. The reaction was clean according to TLC. The reaction mixture was concentrated under reduced pressure to give a residue. The residue was purified by column chromatography (SiO<sub>2</sub>, DCM/MeOH = 100/1 to 10/1). Compound **8** (40.0 g, 75.3 mmol, 55.5% yield, 80.0% purity) was obtained as a yellow solid.

**TLC:** petroleum ether/ethyl acetate = 3/1, R<sub>f</sub> = 0.03





and one main peak with desired  $m/z$  was detected. The reaction mixture was concentrated under reduced pressure to give a residue. The residue was purified by column chromatography ( $\text{SiO}_2$ ,  $\text{DCM}/\text{MeOH} = 20/1$ ). Compound **9** (9.0 g, 18.1 mmol, 85.4% yield, 90.0% purity) was obtained as a yellow solid.

**LCMS:** (product: RT = 1.054 min, MS cal: 448.4,  $[\text{M}+1]^+ = 449.1$ );

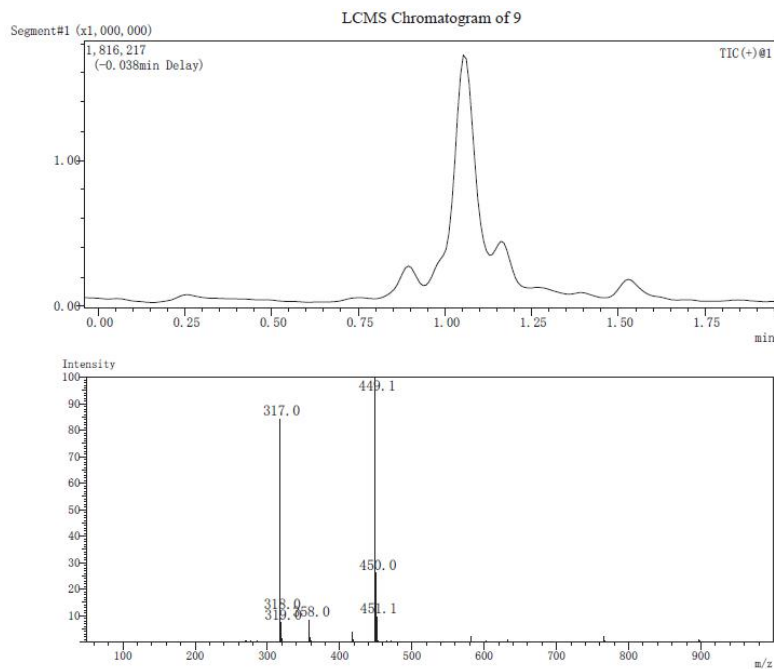

**$^1\text{H}$  NMR:** 400 MHz, MeOD.  $\delta$  ppm 8.84 (s, 1H), 8.03 (d,  $J = 5.4$  Hz, 1H), 7.46 (d,  $J = 5.4$  Hz, 1H), 6.94 (d,  $J = 1.4$  Hz, 1H), 4.40 (s, 2H), 4.15-4.32 (m, 3H), 4.10 (dd,  $J = 12.6, 2.0$  Hz, 1H), 3.90 (dd,  $J = 12.4, 2.2$  Hz, 1H).

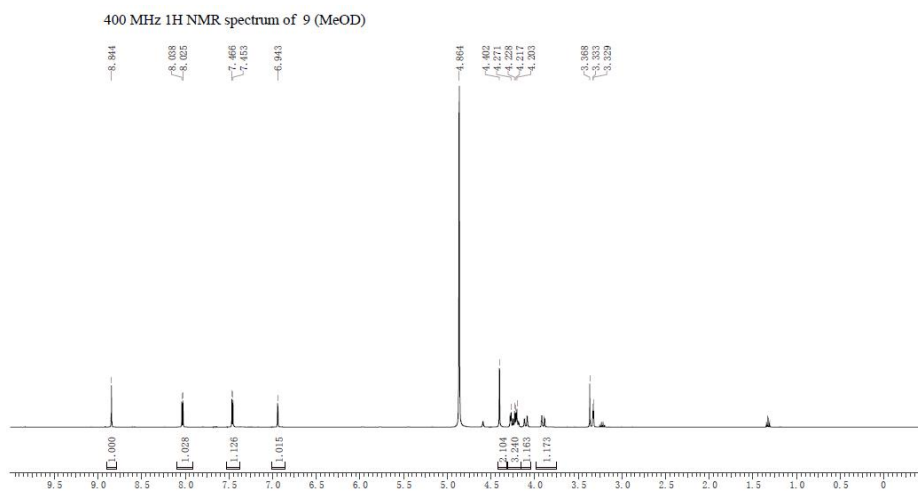

### General procedure for preparation of compound 10

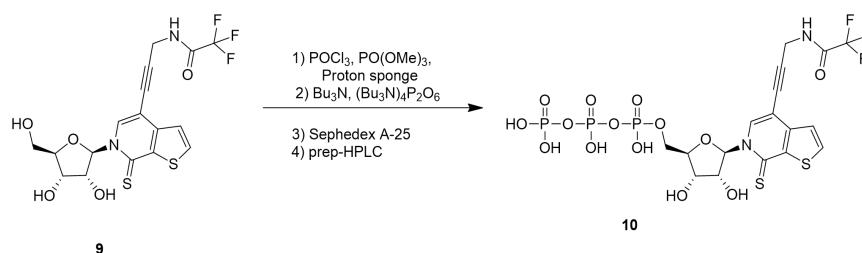

To a solution of compound **9** (2.0 g, 4.5 mmol, 1.0 eq) and proton sponge (955.8 mg, 4.46 mmol, 1.00 eq) in PO(OMe)<sub>3</sub> (20 mL) was added POCl<sub>3</sub> (1.00 g, 6.7 mmol, 621.7 uL, 1.50 eq). The mixture was stirred at 0 °C for 2 h. LC-MS showed compound **9** was consumed completely and one main peak with desired m/z was detected. The crude product (7.60 g, crude) with yellow oil was used into the next step without further purification.

To a solution of crude product (2.50 g, 4.42 mmol, 1.00 eq) in PO(OMe)<sub>3</sub> (20 mL) was added N, N - dibutylbutan -1-amine; phosphono dihydrogen phosphate (12.1 g, 22.1 mmol, 5.00 eq) and N, N- dibutylbutan-1-amine (4.90 g, 26.5 mmol, 6.3 mL, 6.00 eq). The mixture was stirred at 0 °C for 2 h. LC-MS showed material was consumed completely and one peak with desired m/z was detected. Added 1M TEAB to adjust pH7, the reaction mixture was purified by a DEAE Sephadex column (GE Healthcare) with an elution gradient of 0 to 1.0 M TEAB, evaporated to obtain a yellow oil, the crude product **10** (8.0 g, crude) was used into the next step without further purification.

### General procedure for preparation of compound 11(TPT3<sup>A</sup>)

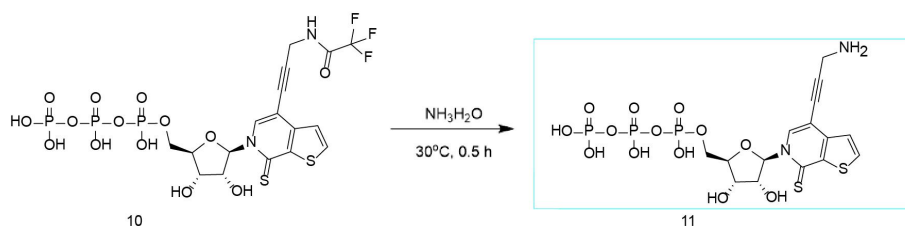

To a solution of compound **10** (5.0 g, 7.3 mmol, 1.00 eq) in NH<sub>3</sub>·H<sub>2</sub>O (5.0 mL) and H<sub>2</sub>O (5.0 mL), then stirred at 30 °C for 0.5 h. LC-MS showed compound **10** was consumed completely and one main peak with desired m/z was detected. The mixture of reaction was purified by prep-HPLC (neutral condition, column: Agela Dura Shell C18 250 x 70mm x 10um; mobile phase: [water (10mM NH<sub>4</sub>HCO<sub>3</sub>)-ACN]; B%: 1%-12%, 22 min). **TPT3-NH2 (TPT3<sup>A</sup>)** (0.85 g, 1.4 mmol, 18.7% yield, 95.0% purity) was obtained as a yellow solid.

**LCMS:** (product: RT = 1.014 min);

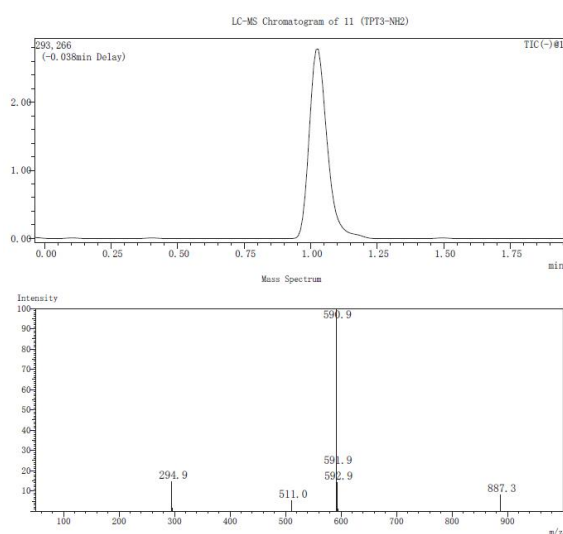

**<sup>1</sup>H NMR:** 400 MHz, D<sub>2</sub>O. δ ppm 8.49 (s, 1H), 7.90 (m, 1H), 7.24 (m, 1H), 6.68 (s, 1H), 4.47 (m, 1H), 4.20-4.39 (m, 4H), 4.03 (s, 2H).

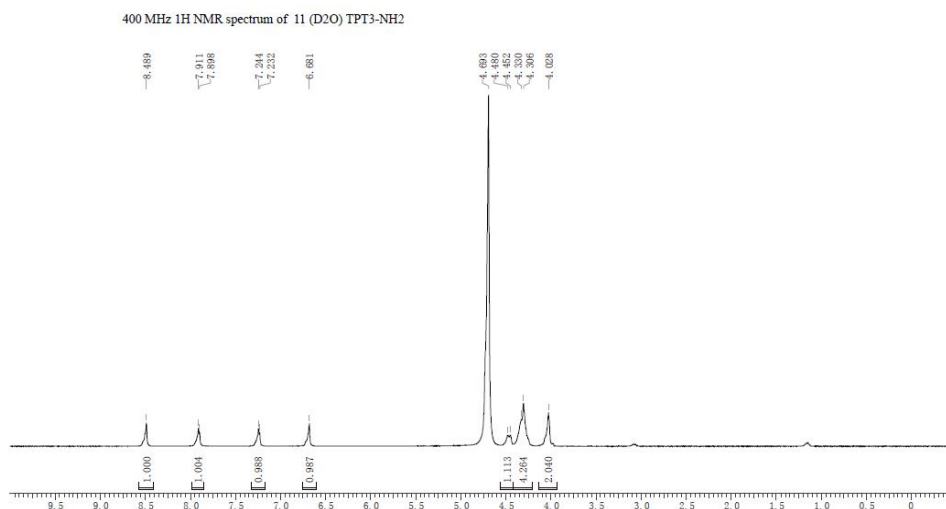

**<sup>31</sup>P NMR:** 400 MHz, D<sub>2</sub>O. δ ppm -8.27 (d, *J* = 17.6 Hz, 1P) -11.45 (d, *J* = 20.6 Hz, 1P) -22.21 (t, *J* = 19.0 Hz, 1P).

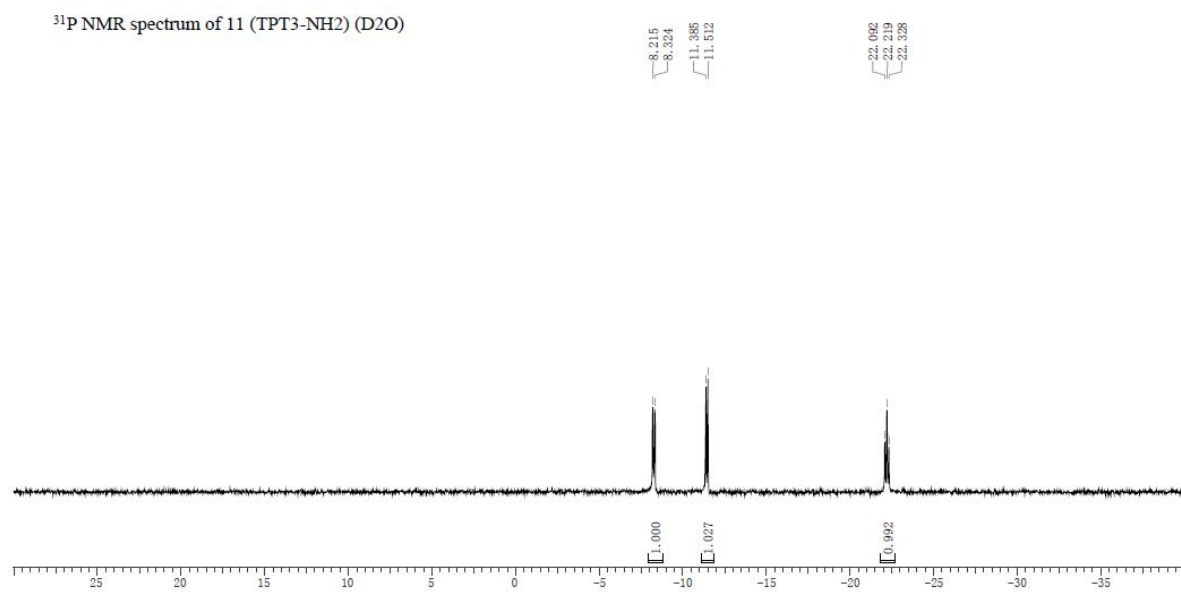

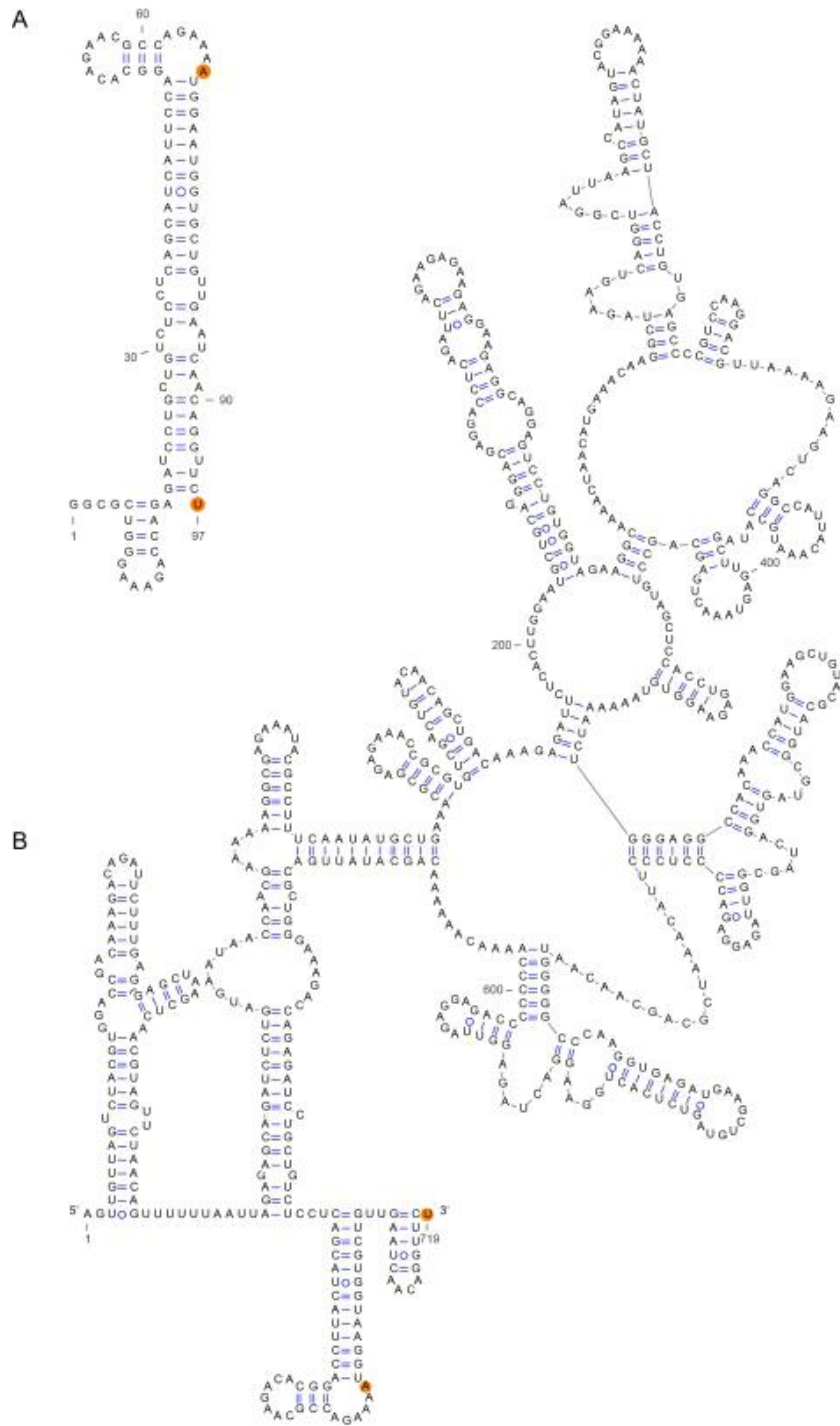

**Fig. S1. (A-B)** Secondary structures of the 97-nt 3'SL **(A)** and 719-nt DENV-mini **(B)** RNAs used in this study. The secondary structure of DENV-mini is the same as in literature (1).

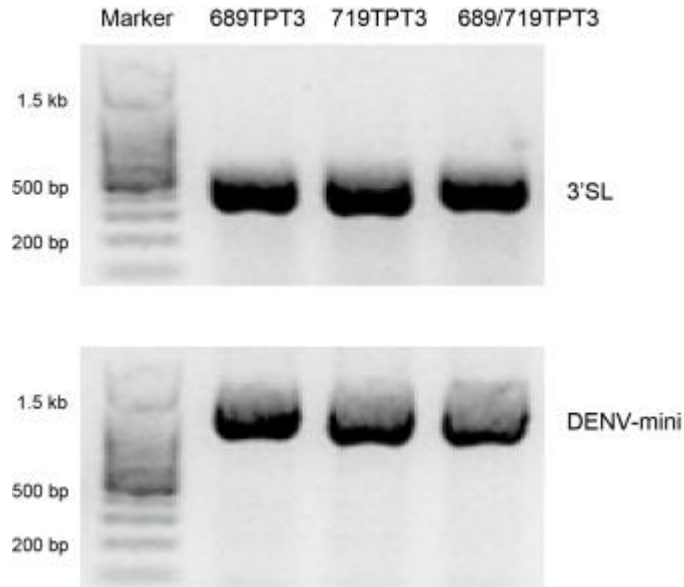

**Fig. S2.** 1% Agarose gel analysis of the 689-single modified, 719-single modified, and 689/719-double modified PCR products coding for 3'SL (504 bp, top) and DENV-mini (1128 bp, down).

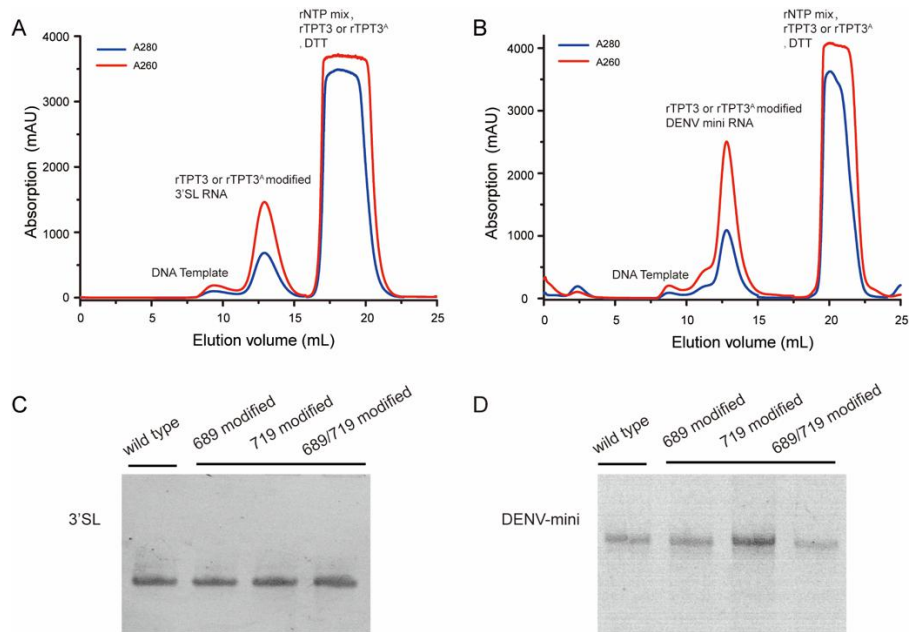

**Fig. S3.** Non-denaturing purification of TPT3 or TPT3<sup>A</sup> modified RNAs. **(A-B)** Direct purification of TPT3 or TPT3<sup>A</sup> modified 3'SL **(A)** or DENV-mini **(B)** RNAs from *in vitro* transcription reaction mixtures by size-exclusion chromatography using Superdex G75 (for 3'SL) or G200 (for DENV-mini RNA) columns. The DNA template, rTPT3 or rTPT3<sup>A</sup> modified 3'SL **(A)** or DENV mini **(B)** RNAs, and the excess rNTPs, rTPT3<sup>A</sup> or rTPT3 and DTT are well separated. **(C-D)** 10% **(C, for 3'SL)** and 5% **(D, for DENV-mini)** native PAGE gel analysis of purified TPT3-modified (singly modified at sites of 689, 719, or doubly modified at sites of both 689 and 719) RNAs. The unmodified wild type 3'SL **(C)** and DENV-mini **(D)** RNAs are included for comparison. .



**Table S1.** The DNA sequences of the total gene synthesized plasmids coding for full-length 3'SL and DENV-mini RNAs from DENV2.

| Plasmids  | Primary sequence                                                                                                                                                                                                                                                                                                                                                                                                                                                                                                                                                                                                                                                                                                                                                                                                                                                                                                                                                                                                                                                                                                                                                                                                                                                                                                                                                                                                                                                                                                                                                                                                                                                                                                                                                                                                                                                                                                                                                                                                                                                                                                                                                                                                                                                                                                                                                                                                                                                                                                                                                            |
|-----------|-----------------------------------------------------------------------------------------------------------------------------------------------------------------------------------------------------------------------------------------------------------------------------------------------------------------------------------------------------------------------------------------------------------------------------------------------------------------------------------------------------------------------------------------------------------------------------------------------------------------------------------------------------------------------------------------------------------------------------------------------------------------------------------------------------------------------------------------------------------------------------------------------------------------------------------------------------------------------------------------------------------------------------------------------------------------------------------------------------------------------------------------------------------------------------------------------------------------------------------------------------------------------------------------------------------------------------------------------------------------------------------------------------------------------------------------------------------------------------------------------------------------------------------------------------------------------------------------------------------------------------------------------------------------------------------------------------------------------------------------------------------------------------------------------------------------------------------------------------------------------------------------------------------------------------------------------------------------------------------------------------------------------------------------------------------------------------------------------------------------------------------------------------------------------------------------------------------------------------------------------------------------------------------------------------------------------------------------------------------------------------------------------------------------------------------------------------------------------------------------------------------------------------------------------------------------------------|
| 3'SL      | <p>AAAATAAACAAATAGGGGTTCCGCGCACATTTCCCGAAAAGTGCCACC<br/> TGACGTCTAAGAAACCATTATTATCATGACATTAACCTATAAAAATAGGCGT<br/> ATCACGAGGCCCTTTCGTTGTA AACGACGGCCAGTCCGTCTCTATCCG<br/> GTCTCGATCCGCAGTCTCTTGGCACAGGTAATACGACTCACTATAAGCGC<br/> TGGGAAAGACCAGAGATCCTGCTGTCTCCTCAGCATCATTCCAGGCACA<br/> GAACGCCAGAAAATGGAATGGTGTGTTGAATCAACAGGTTCTACCGTG<br/> CGAGTTACTGCCAACCGAGACCCAACCGAGACGGGTCATAGCTGTTTCC<br/> AGTGTGCCGCTTCCCTCGCTCACTGACTCGCTGCGCTCGGTGCTTCGGCT<br/> GCGGCGAGCGGTATCAGCTCACTCAAAGGCGGTAATACGGTTACCCACA<br/> GAATCAGGGGATAACGCAGGAAAGAACATGTGAGCAAAGGCCAGCAA<br/> AGGCCAGGAACCGTAAAAAGGCCGCGTTGCTGGCGTTTTTCCATAGGCT<br/> CCGCCCCCTGACGAGCATCATAAAAATCGACGCTCAAGTCAGAGGTGG<br/> CGAAACCCGACAGGACTATAAAGATACCAGGCGTTTCCCCTGGAAGCT<br/> CCCTCGTGCGCTCTCTGTTCCGACCCGCTGCGCTTACCGGATACCTGTC<br/> CGCCTTTCTCCCTTCGGGAAGCGTGGCGCTTCTCAATGCTCACGCTGT<br/> AGGTATCTCAGTTCGGTGTAGGTGCTTCCGCTCCAAGCTGGGCTGTGTGC<br/> ACGAACCCCGTTCAGCCGACCGCTGCGCCTTATCCGGTAACTATCG<br/> TCTTGAGTCCAACCCGGTAAGACACGACTTATCGCCACTGGCAGCAGCC<br/> ACTGGTAACAGGATTAGCAGAGCGAGGTATGTAGGCGGTGCTACAGAGT<br/> TCTTGAAGTGGTGGCCTAACTACGGCTACACTAGAAGGACAGTATTTGGT<br/> ATCTGCGCTCTGCTGAAGCCAGTTACCTTCGGAAAAAGAGTTGGTAGCT<br/> CTTGATCCGGCAAACAAACCACCGCTGGTAGCGGTGGTTTTTTTTGTTTGC<br/> AAGCAGCAGATTACGCGCAGAAAAAAGGATCTCAAGAAGATCCTTTGAT<br/> CTTTTCTACGGGGTCTGACGCTCAGTGAACGAAAACCTCACGTTAAGGG<br/> ATTTTGGTCATGAGATTATCAAAAAGGATCTTACCTAGATCCTTTTAAATT<br/> AAAAATGAAGTTTTAAATCAATCTAAAGTATATATGAGTAACTTGGTCTGA<br/> CAGTTACCAATGCTTAATCAGTGAGGCACCTATCTCAGCGATCTGTCTATT<br/> TCGTTTCATCCATAGTTGCCTGACTCCCGTCTGTGTAGATAACTACGATACG<br/> GGAGGGCTTACCATCTGGCCCCAGTGCTGCAATAATACCGCGGGACCCA<br/> CGCTCACCGGCTCCAGATTTATCAGCAATAAACCAGCCAGCCGGAAGGG<br/> CCGAGCGCAGAAGTGGTCCGCAACTTTATCCGCTCCATCCAGTCTATT<br/> AATTGTTGCCGGGAAGCTAGAGTAAGTAGTTCGCCAGTTAATAGTTTGGC<br/> CAACGTTGTTGCCATCGCTACAGGCATCGTGGTGTACGCTCGTCTGTTT<br/> GGTATGGCTTCATTACAGCTCCGGTCCCAACGATCAAGGCGAGTTACATG<br/> ATCCCCATGTTGTGCAAAAAGCGGTTAGCTCCTTCGGTCCCTCCGATCG<br/> TTGTCAGAAGTAAGTTGGCCCGCGTGTATCACTCATGGTTATGGCAGCA<br/> CTACATAATTCTCTTACTGTATGCCATCCGTAAGATGCTTTTCTGTGACT<br/> GGTAGTACTCAACCAAGTCACTTCTGAGAATAGTGTATGCCGCGACCGA<br/> GTTGCTCTTGCCCGCGTCAATACGGGATAATACCGCGCCACATAGCAGA<br/> ACTTTAAAAGTGCTCATCATTGGAAAACGTTCTTCGGGGCGAAAACCTCTC<br/> AAGGATCTTACCGCTGTTGAGATCCAGTTCGATGTAACCCACTCGTGAC<br/> CCAAGTCTTACAGCATCTTTACTTTACCAGCGTTTCTGGGTGAGCA<br/> AAAACAGGAAGGCAAAATGCCGCAAAAAGGGAATAAGGGCGACACGGA<br/> AATGTTGAATACTCACTCTTCTTTTCAATATTATTGAAGCATTATCAG<br/> GGTATTGTCTCATGAGCGGATACATATTTGAATGTATTTAG</p> |
| DENV-mini | <p>AAAATAAACAAATAGGGGTTCCGCGCACATTTCCCGAAAAGTGCCACC<br/> TGACGTCTAAGAAACCATTATTATCATGACATTAACCTATAAAAATAGGCGT<br/> ATCACGAGGCCCTTTCGTTGTA AACGACGGCCAGTCCGACACGCAAT<br/> GCGTCTCGATCCGCAGTGTCTTGGCTCTCTAATACGACTCACTATAAGTT<br/> GTTAGTCTACGTGGACCGACAAAGACAGATTCTTTGAGGGAGCTAAGCT<br/> CAACGTAGTTCTAACAGTTTTTAAATTAGAGAGCAGATCTCTGATGAATAA<br/> CCAACGAAAAAAGGCGAGAAATACGCCTTTCAATATGCTGAAACGCGAGA<br/> GAAACCGCGTGTGACTGTACAACAGCTGACAAAGAGATTCTCACTTGG<br/> AATGCTGCAGGGACGAGGACCTCAGATTCAGAAGAGAAGAGGAAGAGG<br/> CAGGAGTCTGTGGTAGAAGGCCAAAACCTAACATGAAACAAGGCTAGAAG</p>                                                                                                                                                                                                                                                                                                                                                                                                                                                                                                                                                                                                                                                                                                                                                                                                                                                                                                                                                                                                                                                                                                                                                                                                                                                                                                                                                                                                                                                                                                                                                                                                                                                                                                                                                                                                                                                                                                                                                                                                 |

TCAGGTCGGATTAAGCCATAGTACGGAAAAAACTATGCTACCTGTGAGCC  
 CCGTCCAAGGACGTTAAAAGAAGTCAGGCCATTACAAATGCCATAGCTTG  
 AGTAAACTGAGCAGCCTGTAGCTCCACCTGAGAAGGTGTA AAAAATCTG  
 GGAGGCCACAAACCATGGAAGCTGTACGCATGGCGTAGTGGACTAGCG  
 GTTAGAGGAGACCCCTCCCTTACAAATCGCAGCAACAATGGGGGCCAA  
 GGTGAGATGAAGCTGTAGTCTCACTGGAAGGACTAGAGGTTAGAGGAGA  
 CCCCCCAAAAACAAAAACAGCATATTGACGCTGGGAAAAGACCAGAGAT  
 CCTGCTGTCTCCTCAGCATCATTCCAGGCACAGAACGCCAGAAAATGGA  
 ATGGTGCTGTTGAATCAACAGGTTCTAGAGACGGAGTCACTGCCAACCG  
 AGACGGTCATAGCTGTTTCCTGTGTGCCGCTTCCTCGCTCACTGACTCG  
 CTGCGCTCGGTCTTCGGCTGCGGCGAGCGGTATCAGCTCACTCAAAG  
 GCGGTAATACGGTTACCCACAGAATCAGGGGATAACGCAGGAAAAGAACAT  
 GTGAGCAAAGGCCAGCAAAGGCCAGGAACCGTAAAAAGGCCGCGTT  
 GCTGGCGTTTTTTCATAGGCTCCGCCCCCTGACGAGCATCACAAAAAT  
 CGACGCTCAAGTCAGAGGTGGCGAAACCCGACAGGACTATAAAATACC  
 AGGCGTTTTCCCCTGGAAGCTCCCTCGTGCGCTCTCCTGTTCCGACCCT  
 GCCGCTTACCGGATACCTGTCCGCCTTTCTCCCTTCGGGAAGCGTGCG  
 CTTTCTCATAGCTCACGCTGTAGGTATCTCAGTTCGGTGTAGGTCGTTTCG  
 CTCCAAGCTGGGCTGTGTGCACGAACCCCCGTTACGCCGACCCTG  
 CGCCTTATCCGGTAACTATCGTCTTGAGTCCAACCCGGTAAGACACGACT  
 TATCGCCACTGGCAGCAGCCACTGGTAACAGGATTAGCAGAGCGAGGTA  
 TGTAGGCGGTGCTACAGAGTTCTTGAAGTGGTGGCCTAACTACGGCTAC  
 ACTAGAAGGACAGTATTTGGTATCTGCGCTCTGCTGAAGCCAGTTACCTT  
 CGGAAAAAGAGTTGGTAGCTCTTGATCCGGCAAACAAACCACCGCTGGT  
 AGCGGTGGTTTTTTGTTTGCAAGCAGCAGATTACGCGCAGAAAAAAG  
 GATCTCAAGAAGATCCTTTGATCTTTTCTACGGGGTCTGACGCTCAGTGG  
 AACGAAAACCTCACGTTAAGGGATTTTGGTTCATGAGATTATCAAAAAGGATC  
 TTCACCTAGATCCTTTTAAATTA AAAATGAAGTTTTAAATCAATCTAAAGTAT  
 ATATGAGTAACTTGGTCTGACAGTTACCAATGCTTAATCAGTGAGGCACC  
 TATCTCAGCGATCTGTCTATTTTCGTTTCATCCATAGTTGCCTGACTCCCCGT  
 CGTGTAGATAACTACGATACGGGAGGGCTTACCATCTGGCCCCAGTGCT  
 GCAATAATACCGCGGGACCCACGCTCACCGGCTCCAGATTTATCAGCAAT  
 AAACCAGCCAGCCGGAAGGGCCGAGCGCAGAAGTGGTCTGCAACTTT  
 ATCCGCCTCCATCCAGTCTATTAATTGTTGCCGGGAAGCTAGAGTAAGTA  
 GTTCGCCAGTTAATAGTTTGCGCAACGTTGTTGCCATCGCTACAGGCATC  
 GTGGTATCACGCTCGTCTGTTGGTATGGCTTCATTCAGCTCCGGTCCCA  
 ACGATCAAGGCGAGTTACATGATCCCCATGTTGCGCAAAAAAGCGGTTA  
 GCTCCTTCGGTCCCTCCGATCGTTGTGTCAGAAGTAAGTTGGCCGCGCTGTT  
 ATCACTCATGGTTATGGCAGCACTACATAATTCTCTTACTGTCTATGCCATC  
 CGTAAGATGCTTTTCTGTGACTGGTGAGTACTCAACCAAGTCATTCTGAG  
 AATAGTGTATGCGGCGACCGAGTTGCTCTTGCCCGGCGTCAATACGGGA  
 TAATACCGCGCCACATAGCAGAACTTTAAAAGTGCTCATCATTGGAAAACG  
 TTCTTCGGGGCGAAAACCTCAAGGATCTTACCGCTGTTGAGATCCAGTT  
 CGAT**GTAAACCCACTCGTGCACCCAACT**GATCTTCAGCATCTTTTACTTTCA  
 CCAGCGTTTCTGGGTGAGCAAAAACAGGAAGGCAAATGCCGCAAAAAA  
 GGGGAATAAGGGCGACACGGAAATGTTGAATACTCATACTCTCCTTTTTTCA  
 ATATTATTGAAGCATTATCAGGGTTATTGTCTCATGAGCGGATACATATT  
 GAATGTATTTAG

- <sup>a</sup>: The DNA sequences coding for the 3'SL (97 nts) and DENV-mini (719 nts) RNAs are colored in red;
- <sup>b</sup>: The T7 promoter is colored in green;
- <sup>c</sup>: The common upstream sequence targeted by pMVF primer is colored in blue.

**Table S2.** The ssDNA primers used for dsDNA template preparations by PCR.

| Primers  | Sequence                                                          | Application                                                                   |
|----------|-------------------------------------------------------------------|-------------------------------------------------------------------------------|
| pMVF     | 5'-GTAACCCACTCGTGCACCCAACTG-3'                                    | Forward primer                                                                |
| 689R     | 5'-AGAACCTGTTGATTCAACAGCACCATTCCA<br>(NaM)TTTCTGGCGTTCTG-3'       | Reverse primer for T <sub>689</sub> NaM<br>modification                       |
| 719R     | 5'-(NaM)GAACCTGTTGATTCAACAGCACCATT<br>C-3'                        | Reverse primer for A <sub>719</sub> NaM<br>modification                       |
| 689/719R | 5'-(NaM)GAACCTGTTGATTCAACAGCACCATT<br>CCA(NaM)TTTCTGGCGTTCTGTG-3' | Reverse primer for T <sub>689</sub> NaM<br>/A <sub>719</sub> NaM modification |
| 3'SLR    | 5'-AGACCCATGGATTTCCCCACACCGG-3'                                   | Reverse primer for native<br>3'SL and DENV-mini RNAs                          |

**Table S3.** Specific PCR conditions for amplification of the UBP-modified dsDNA templates.

| Product DNA         | 3'SL                 |                      |                                               | DENV-mini            |                      |                                               |
|---------------------|----------------------|----------------------|-----------------------------------------------|----------------------|----------------------|-----------------------------------------------|
|                     | A <sub>689</sub> NaM | T <sub>719</sub> NaM | A <sub>689</sub> NaM/<br>T <sub>719</sub> NaM | A <sub>689</sub> NaM | T <sub>719</sub> NaM | A <sub>689</sub> NaM/<br>T <sub>719</sub> NaM |
| 2×PCR mix           | 25 μL                |                      |                                               |                      |                      |                                               |
| Template            | 4 ng/μL              | 4 ng/μL              | 6 ng/μL                                       | 8 ng/μL              | 8 ng/μL              | 10 ng/μL                                      |
| dTPT3-TP            | 1 mM                 | 1 mM                 | 1.4 mM                                        | 1 mM                 | 1 mM                 | 1.4 mM                                        |
| Forward primer      | 0.8 μM<br>(pMVF)     |                      | 1 μM<br>(pMVF)                                | 0.8 μM<br>(pMVF)     |                      | 1 μM<br>(pMVF)                                |
| Reverse primer      | 0.8 μM<br>(689R)     | 0.8 μM<br>(719R)     | 1 μM<br>(689/719R)                            | 0.8 μM<br>(689R)     | 0.8 μM<br>(719R)     | 1 μM<br>(689/719R)                            |
| dd H <sub>2</sub> O | To 50 μL             |                      |                                               |                      |                      |                                               |

**Table S4.** Typical conditions for *in vitro* transcription of 3'SL and DENV-mini RNAs containing UBP.

| Product RNA                 | 3'SL                  |                       |                                                 | DENV-mini             |                       |                                                 |
|-----------------------------|-----------------------|-----------------------|-------------------------------------------------|-----------------------|-----------------------|-------------------------------------------------|
|                             | A <sub>689</sub> TPT3 | T <sub>719</sub> TPT3 | A <sub>689</sub> TPT3/<br>T <sub>719</sub> TPT3 | A <sub>689</sub> TPT3 | T <sub>719</sub> TPT3 | A <sub>689</sub> TPT3/<br>T <sub>719</sub> TPT3 |
| 10 × Transcription buffer   | 10 μL                 |                       |                                                 |                       |                       |                                                 |
| MgCl <sub>2</sub>           | 20 mM                 |                       |                                                 | 30 mM                 |                       |                                                 |
| T7 RNA polymerase           | 200 ng/μL             |                       |                                                 |                       |                       |                                                 |
| NaM-modified DNA template   | 4 μM                  | 4 μM                  | 6 μM                                            | 4 μM                  | 4 μM                  | 6 μM                                            |
| rNTP mix                    | 4 mM each             |                       |                                                 |                       |                       |                                                 |
| rTPT3 or rTPT3 <sup>A</sup> | 0.8 mM                |                       | 1 mM                                            | 0.8 mM                |                       | 1 mM                                            |
| DTT                         | 10 mM                 |                       |                                                 |                       |                       |                                                 |
| DEPC-H <sub>2</sub> O       | To 100 μL             |                       |                                                 |                       |                       |                                                 |

**Table S5.** Overall structural parameters for native, UBP-modified and Nanogold-conjugated 3'SL and DENV-mini RNAs were calculated using similar procedures as described before (2).

| Sample                        | $R_g^a$ (Å) | $R_g^b$ (Å) | $D_{max}$ (Å) | MW <sup>c</sup> (kDa) | MW <sup>d</sup> (kDa) |
|-------------------------------|-------------|-------------|---------------|-----------------------|-----------------------|
| 3'SL WT                       | 35.3±0.6    | 38.3±0.6    | 129           | 32,100                | 30,229                |
| 3'SL 689-TPT3                 | 35.8±0.2    | 37.6±0.5    | 127           | 32,300                | 31,898                |
| 3'SL 719-TPT3                 | 35.7±0.9    | 37.6±0.5    | 127           | 32,300                | 30,910                |
| 3'SL 689/719-TPT3             | 35.0±0.6    | 38.6±1.2    | 130           | 32,500                | 30,058                |
| 3'SL 689 Single-Nanogold      | 35.2±1.2    | 37.3±1.2    | 135           | 47,500                | n/a                   |
| 3'SL 719 Single-Nanogold      | 36.3±0.5    | 40.7±1.2    | 150           | 47,500                | n/a                   |
| 3'SL Double-Nanogold          | 39.4±0.5    | 41.2±1.1    | 156           | 62,500                | n/a                   |
| DENV-mini WT                  | 84.1±0.2    | 89.5±2.0    | 309           | 237,270               | 193,173               |
| DENV-mini 689-TPT3            | 83.3±0.6    | 90.2±2.5    | 310           | 237,470               | 197,528               |
| DENV-mini 719-TPT3            | 86.0±0.4    | 91.7±1.7    | 311           | 237,470               | 210,785               |
| DENV-mini 689/719-TPT3        | 84.3±0.7    | 90.5±1.1    | 310           | 237,670               | 205,469               |
| DENV-mini 689 Single-Nanogold | 88.2±0.5    | 91.0±1.8    | 313           | 252,670               | n/a                   |
| DENV-mini 719 Single-Nanogold | 87.2±0.6    | 89.8±1.9    | 310           | 252,670               | n/a                   |
| DENV-mini Double- Nanogold    | 89.9±0.9    | 91.5±1.4    | 316           | 267,670               | n/a                   |
| 1.4 nm Nanogold               | 8.1±0.03    | 8.1±0.06    | 18            | 15,000                | n/a                   |

<sup>a</sup> Derived from Guinier fitting;

<sup>b</sup> derived from GNOM analysis (3);

<sup>c</sup> MW: molecular weight predicted from sequences;

<sup>d</sup> MW: molecular weight calculated based on the power law of volume of correlation (4); n/a: not applicable.

**Table S6.** The coupling efficiencies for Nanogold-conjugated 3'SL and DENV-mini RNAs.

| Sample                        | A <sub>260</sub> | A <sub>420</sub> | Con <sub>Gold</sub> /Con <sub>RNA</sub> | Labeling efficiency (%) |
|-------------------------------|------------------|------------------|-----------------------------------------|-------------------------|
| 3'SL 689 Single-Nanogold      | 2.537            | 0.287            | 0.836                                   | 83.6                    |
| 3'SL 719 Single-Nanogold      | 2.602            | 0.305            | 0.864                                   | 86.4                    |
| 3'SL Double- Nanogold         | 2.061            | 0.332            | 1.750                                   | 87.5                    |
| DENV-mini 689 Single-Nanogold | 7.536            | 0.119            | 0.738                                   | 73.8                    |
| DENV-mini 719 Single-Nanogold | 6.942            | 0.101            | 0.791                                   | 79.1                    |
| DENV-mini Double- Nanogold    | 6.063            | 0.225            | 1.615                                   | 80.8                    |

**Table S7.** SAXS data collection parameters and softwares employed for data analysis are similar as described before (2).

| <b><i>Data Collection Parameters</i></b> |                                                |
|------------------------------------------|------------------------------------------------|
| Facilities and parameters                | Settings and values                            |
| Beam line                                | 12ID-B (APS, ANL)                              |
| Wavelength (Å)                           | 0.8857                                         |
| Detector                                 | Pilatus 1M (SAXS)                              |
| $q$ range (Å <sup>-1</sup> )             | 0.005-0.89                                     |
| Exposure time (s)                        | 3 (XSI)-30 (SAXS)                              |
| Concentration range (mg/ml)              | 0.25-1 for unlabeled, 1-7 for Nanogold-labeled |
| Temperature (K)                          | 298                                            |
| <b><i>Software Employed</i></b>          |                                                |
| Primary Data Processing                  | Matlab/PRIMUS (5)                              |
| $P(r)$ Function                          | GNOM (3)                                       |



## SI References

1. J. Sztuba-Solinska *et al.*, Structural complexity of Dengue virus untranslated regions: cis-acting RNA motifs and pseudoknot interactions modulating functionality of the viral genome. *Nucleic Acids Res* **41**, 5075-5089 (2013).
2. Y. Zhang *et al.*, Long non-coding subgenomic flavivirus RNAs have extended 3D structures and are flexible in solution. *EMBO Rep* 10.15252/embr.201847016, e47016 (2019).
3. D. I. Svergun, Determination of the regularization parameter in indirect-transform methods using perceptual criteria. *J. Appl. Cryst.* **25**, 495-503 (1992).
4. R. P. Rambo, J. A. Tainer, Accurate assessment of mass, models and resolution by small-angle scattering. *Nature* **496**, 477-481 (2013).
5. P. V. Konarev, V. V. Volkov, A. V. Sokolova, M. H. J. Koch, D. I. Svergun, PRIMUS - a Windows-PC based system for small-angle scattering data analysis. *J Appl Cryst.* **36**, 1277-1282 (2003).
